# Supplementary material for: Developing GIS-based water poverty and rainwater harvesting suitability maps for domestic use in the Dead Sea region (West Bank, Palestine)
Source: Copernicus journal article supplement (doi:10.5194/hess-23-1581-2019), 2019-03-18
Supplement: Supplementary file 1 [file hess-23-1581-2019-supplement.zip]

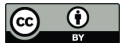

## *Supplement of*

# **Developing GIS-based water poverty and rainwater harvesting suitability maps for domestic use in the Dead Sea region (West Bank, Palestine)**

**Sameer M. Shadeed et al.**

*Correspondence to:* Sameer M. Shadeed (sshadeed@najah.edu)

- [hess-23-1581-2019-supplement-title-page.pdf](#)
- GIS-data
  - Criteria
    - \* DRWHS
    - \* DWP
  - Maps
    - \* DRWHS
    - \* DWP

The copyright of individual parts of the supplement might differ from the CC BY 4.0 License.
